# Supplementary material
Source: publisher figshare collection journal article supplement (https://sage.figshare.com/ndownloader/files/16188341)

## HPV Status Improves Classification of Head and Neck Gray Zone Cancers

J. Ren, W. Xu, J. Su, X. Ren, N. Bender, S. Habbous, J.R. de Almeida, D.P. Goldstein, D. Cheng, Z. Chen, M. Mirshams, M. Rahini, S.H. Huang, A. Spreafico, A. Hansen, J. Kim, J. Waldron, B. Perez-Ordóñez, Y. Zhao, R. Hung, T. Waterboer, and G. Liu

### Appendix

**Appendix Table 1. Definitions for HPV seropositivity.** <sup>1</sup>The cut-off for positivity for HPV 16 E6 is different between Standards 1 and 2; the Standard 1 cut-off is > 1000 MFI and thus the panel label is s1-16E6, while for standard 2 the cut-off is >484 MFI, and is labelled s2-16E6.

| Definition                                                      | HPV Seromarkers, definition of positive                                                                                             | Panel Label         |
|-----------------------------------------------------------------|-------------------------------------------------------------------------------------------------------------------------------------|---------------------|
| Standard 1                                                      | HPV 16 E6 alone (> 1000 MFI)                                                                                                        | s1-16E6             |
| Standard 2:<br>either of the two<br>definitions on<br>the right | 3 of 4 high levels of the following markers: HPV 16 E1 (s2-16E1), HPV 16 E2 (s2 16E2), HPV 16 E6 (s2 16E6), and HPV 16 E7 (s2 16E7) | s2 16               |
|                                                                 | 3 of 4 high levels of the following markers: HPV 18 E1 (s2 18E1), HPV 18 E2 (s2 18E2), HPV 18 E6 (s2 18E6), and HPV 18 E7 (s2 18E7) | s2 18               |
| Standard 3:<br>type-specific<br>combinations of<br>E6 AND E7    | High levels of both HPV 18 E6 (s3 18E6) AND E7 (s3 18E7)                                                                            | s3 18               |
|                                                                 | High levels of both HPV 31 E6 (s3 31E6) AND E7 (s3 31E7)                                                                            | s3 31               |
|                                                                 | High levels of both HPV 33 E6 (s3 33E6) AND E7 (s3 33E7)                                                                            | s3 33               |
|                                                                 | High levels of both HPV 35 E6 (s3 35E6) AND E7 (s3 35E7)                                                                            | s3 35               |
|                                                                 | High levels of both HPV 45 E6 (s3 45E6) AND E7 (s3 45E7)                                                                            | s3 45               |
|                                                                 | High levels of both HPV 52 E6 (s3 52E6) AND E7 (s3 52E7)                                                                            | s3 52               |
|                                                                 | High levels of both HPV 58 E6 (s3 58E6) AND E7 (s3 58E7)                                                                            | s3 58               |
| Combined Standards                                              | Either one of Standard 1 or Standard 2 or Standard 3                                                                                | HPV <sub>sero</sub> |

**Appendix Table 2. Comparison between HPV-positive grey zone and HPV-positive OPC**

| Covariate                | Categories                   | HPV-positive<br>OPSCC (n=737) | HPV-positive<br>Discrepancy (n=28) | HPV-positive<br>SCCUPHN (n=67) | p-value |
|--------------------------|------------------------------|-------------------------------|------------------------------------|--------------------------------|---------|
| <b>Age</b>               | Mean (standard deviation)    | 60 (9.1)                      | 58.7 (10.2)                        | 59.2 (9.4)                     | 0.82    |
|                          | Median (Range)               | 59.4 (33.2,85.3)              | 59.4 (22.7,77.4)                   | 59.6 (34.9,88.2)               |         |
| <b>Sex</b>               | Female/Male                  | 15%/85%                       | 4%/96%                             | 13%/87%                        | 0.25    |
| <b>Marital status</b>    | Married/Never                | 92%/8%                        | 96%/4%                             | 96%/4%                         | 0.54    |
| <b>BMI</b>               | Mean (sd)                    | 27.4 (5.1)                    | 26.3 (3.8)                         | 28 (4.5)                       | 0.16    |
|                          | Median (Range)               | 26.7 (13.7,49)                | 25.9 (21.2,36.2)                   | 27.8 (17,39.8)                 |         |
| <b>CCI</b>               | 0/1/2/3+                     | 73%/19%/6%/2%                 | 71%/21%/4%/4%                      | 78%/13%/4%/4%                  | 0.54    |
| <b>Smoker</b>            | Current/Ex-smoker            | 20%/46%                       | 29%/39%                            | 28%/34%                        | 0.31    |
|                          | Never                        | 34%                           | 32%                                | 37%                            |         |
| <b>Smoking pack-year</b> | Mean (standard deviation)    | 25.5 (22.6)                   | 16 (17.1)                          | 22.5 (17.5)                    | 0.10    |
|                          | Median (Range)               | 20.9 (0.008,220)              | 10 (0.5,51)                        | 20 (1,80)                      |         |
| <b>Alcohol Status</b>    | Current/Former               | 52%/27%                       | 72%/11%                            | 67%/17%                        | 0.43    |
|                          | Never                        | 21%                           | 17%                                | 17%                            |         |
| <b>Alcohol Use</b>       | Heavy/Moderate               | 11%/16%                       | 11%/29%                            | 14%/9%                         | 0.22    |
|                          | Non or light drinker         | 72%                           | 61%                                | 77%                            |         |
| <b>Urban rural</b>       | R/U                          | 16%/84%                       | 18%/82%                            | 21%/79%                        | 0.53    |
| <b>Subsite</b>           | OPC:Tongue Base/Tonsil/Other | 40%/58%/2%                    | 77%/14%/5%                         | 0%/0%/0%                       | <0.001  |
|                          | Tongue                       | 0%                            | 5%                                 | 0%                             |         |
|                          | Unknown primary              | 0%                            | 18%                                | 100%                           |         |
| <b>T-stage</b>           | T0/T1/T2                     | 0%/19%/40%                    | 21%/21%/25%                        | 100%/0%/0%                     | <0.001  |
|                          | T3/T4                        | 26%/15%                       | 14%/18%                            | 0%/0%                          |         |
| <b>N-stage</b>           | N0/N1                        | 6%/7%                         | 7%/7%                              | 0%/13%                         | 0.25    |
|                          | N2/N3                        | 80%/6%                        | 79%/7%                             | 78%/9%                         |         |
| <b>M-stage</b>           | M0/M1                        | 99%/1%                        | 100%/0%                            | 100%/0%                        | 1.00    |
| <b>Clinical Stage</b>    | 0/I/II                       | 0%/0%/2%                      | 0%/0%/7%                           | 0%/0%/0%                       | 0.47    |
|                          | III/IV                       | 9%/88%                        | 7%/86%                             | 12%/88%                        |         |
| <b>Follow-up time</b>    | Median (Range)               | 3.4 (0,9.8)                   | 1.8 (0.1,8)                        | 4.2 (0.2,8.4)                  | 0.09    |
| <b>Treatment</b>         | CRT/RT/surgery only          | 68%/29%/4%                    | 45%/52%/3%                         | 59%/39%/1%                     | 0.08    |
| <b>Chemo</b>             | No/Yes                       | 41%/59%                       | 32%/68%                            | 55%/45%                        | 0.06    |

Legend: for significance testing, Kruskal-Wallis test was used for continuous variables, while the chi-squared test was used for categorical variables.

**Appendix Table 3. Comparisons among HPV-negative grey zone groups, oral cavity squamous-cell carcinoma and HPV-negative oropharyngeal squamous-cell carcinoma.**

| Covariate         | Categories            | HPV-negative SCCUPHN vs. OSCC |                  |                | HPV-negative discrepancy vs. HPV-negative |                            |         |
|-------------------|-----------------------|-------------------------------|------------------|----------------|-------------------------------------------|----------------------------|---------|
|                   |                       | HPV negative SCCUPHN (n=25)   | OSCC (n=721)     | p-value        | HPV negative discrepancy (n=38)           | HPV negative OPSCC (n=201) | p-value |
| Age               | Mean (sd)             | 62.4 (9.9)                    | 63.4 (12.5)      | 0.50           | 62.1 (10.4)                               | 63.3 (10)                  | 0.61    |
|                   | Median (Range)        | 59.8 (46.8,87.1)              | 63.5 (21.8,96.4) |                | 64.5 (38.5,81.7)                          | 63.8 (33,88.5)             |         |
| Sex               | Female/Male           | 16%/84%                       | 34%/66%          | 0.09           | 34%/66%                                   | 25%/75%                    | 0.23    |
| Marital           | Married/Never         | 84%/16%                       | 92%/8%           | 0.13           | 92%/8%                                    | 85%/15%                    | 0.31    |
| BMI               | Mean (sd)             | 27.1 (4.4)                    | 25.8 (5.3)       | 0.09           | 24.8 (5.4)                                | 24.1 (5.6)                 | 0.29    |
|                   | Median (Range)        | 26.6 (17.3,36.5)              | 25.1 (14.3,53.3) |                | 24.1 (15.4,36)                            | 23.2 (13.2,46.3)           |         |
| CCI               | 0/1/2/3+              | 68%/20%/8%/4%                 | 61%/28%/8%/4%    | 0.82           | 74%/13%/8%/5%                             | 58%/30%/8%/3%              | 0.11    |
| Smoker            | Current/ex-smoker     | 44%/32%                       | 35%/32%          | 0.56           | 45%/42%                                   | 54%/36%                    | 0.09    |
|                   | Never                 | 24%                           | 33%              |                | 12%                                       | 9%                         |         |
| Smoking pack-year | Mean (sd)             | 30.9 (14)                     | 32.1 (22.9)      | 0.84           | 36.4 (31.9)                               | 41 (25.2)                  | 0.10    |
|                   | Median (Range)        | 30 (4,55)                     | 30 (0,125)       |                | 30 (1.9,150)                              | 40 (0.6,145)               |         |
| Alcohol Status    | Current/Former        | 56%/16%                       | 53%/14%          | 0.85           | 66%/18%                                   | 52%/37%                    | 0.07    |
|                   | Never                 | 28%                           | 33%              |                | 16%                                       | 11%                        |         |
| Alcohol Use       | Heavy/Moderate        | 16%/24%                       | 15%/12%          | 0.15           | 23%/22%                                   | 40%/16%                    | 0.08    |
|                   | Non- or light drinker | 60%                           | 73%              |                | 55%                                       | 44%                        |         |
| Urban rural       | R/U                   | 12%/88%                       | 11%/89%          | 0.75           | 11%/89%                                   | 13%/87%                    | 0.80    |
| Subsite           | OPC: Tongue           | -                             | -                | Not applicable | 17%/14%/22%                               | 28%/41%/31%                | <0.001  |
|                   | OSCC: Tongue/other    | 0%/0%                         | 48%/52%          |                | 31%/17%                                   | 0%/0%                      |         |
|                   | Unknown primary       | 25                            | 0                |                | 2                                         | 0                          |         |
| T-stage           | T0/T1/T2              | 100%/0%/0%                    | 4%/32%/30%       | <0.001         | 6%/25%/22%                                | 0%/10%/30%                 | 0.002   |
|                   | T3/T4                 | 0%/0%                         | 13%/21%          |                | 33%/14%                                   | 30%/30%                    |         |
| N-stage           | N0/N1                 | 0%/4%                         | 57%/13%          | <0.001         | 50%/6%                                    | 25%/12%                    | 0.03    |
|                   | N2/N3                 | 68%/28%                       | 29%/1%           |                | 42%/3%                                    | 56%/7%                     |         |
| M-stage           | M0/M1                 | 92%/8%                        | 98%/2%           | 0.07           | 95%/5%                                    | 97%/3%                     | 0.63    |
| Clinical Stage    | 0/I/II                | 0%/0%/0%                      | 2%/26%/17%       | <0.001         | 0%/17%/11%                                | 0%/4%/11%                  | 0.01    |
|                   | III/IV                | 5%/95%                        | 14%/41%          |                | 25%/47%                                   | 15%/69%                    |         |
| Follow-up time    | Median (Range)        | 2.0 (0.2,5.4)                 | 3.2 (0,10.6)     | 0.09           | 1.7 (0.2,8)                               | 3.3 (0.1,9.7)              | 0.35    |
| Received Chemo    | No/Yes                | 48%/52%                       | 84%/16%          | <0.001         | 76%/24%                                   | 66%/34%                    | 0.26    |

*Appendix Table 4. Multivariable analysis for overall survival among each comparison groups.*

| OPSCC HPV-positive vs. HPV-negative                             |                        |                                                                           |         | HPV-positive OPSCC vs. HPV-positive Grey zone                        |                        |                   |         |
|-----------------------------------------------------------------|------------------------|---------------------------------------------------------------------------|---------|----------------------------------------------------------------------|------------------------|-------------------|---------|
| Covariate                                                       |                        | HR (95%CI)                                                                | p-value | Covariate                                                            |                        | HR (95%CI)        | p-value |
| Group                                                           | HPV+ OPC               | reference                                                                 | <0.001  | Group                                                                | HPV+ OPC               | reference         | 0.35    |
|                                                                 | HPV- OPC               | 3.26 (2.38,4.46)                                                          |         |                                                                      | HPV+ Discrepancy       | 1.22 (0.52,4.42)  |         |
|                                                                 |                        |                                                                           |         |                                                                      |                        | HPV+ SCCUPHN      |         |
| Age                                                             | per year increase      | 1.00 (0.99,1.02)                                                          | 0.61    | Age                                                                  | per year increase      | 1.02 (1.00,1.05)  | 0.03    |
| Stage                                                           | 0/I/II                 | reference                                                                 | <0.001  | Stage                                                                | 0/I/II                 | reference         | 0.16    |
|                                                                 | III/IV                 | 3.21 (1.75,5.89)                                                          |         |                                                                      | III/IV                 | 2.73 (0.66,11.25) |         |
| Pack years                                                      | per pack-year increase | 1.01 (1,1.01)                                                             | 0.006   | Pack years                                                           | per pack-year increase | 1.01 (1.01,1.02)  | <0.001  |
| Chemo                                                           | NO                     | reference                                                                 | <0.001  | Chemo                                                                | NO                     | reference         | 0.0089  |
|                                                                 | YES                    | 0.45 (0.33,0.62)                                                          |         |                                                                      | YES                    | 0.59 (0.40,0.88)  |         |
| SCCUPHN: HPV-positive vs. HPV-negative                          |                        |                                                                           |         | HPV-negative OPSCC vs. HPV-negative clinician-ICD coding discrepancy |                        |                   |         |
| Group                                                           | HPV+ SCCUPHN           | reference                                                                 | 0.015   | Group                                                                | HPV- OPC               | reference         | 0.19    |
|                                                                 | HPV- SCCUPHN           | 4.61 (1.34,15.9)                                                          |         |                                                                      | HPV- discrepancy       | 0.83 (0.43,1.5)   |         |
| Age at Dx                                                       | per year increase      | 1.02 (0.96,1.08)                                                          | 0.45    | Age                                                                  | per year increase      | 1.00 (0.97,1.02)  | 0.67    |
| Stage                                                           | 0/I/II                 | not applicable as by definition, almost all SCCUPHN would be Stage III/IV |         | Stage                                                                | 0/I/II                 | reference         | <0.001  |
|                                                                 | III/IV                 |                                                                           |         |                                                                      | III/IV                 | 2.84 (1.56,5.18)  |         |
| Pack years                                                      | per pack-year increase | 0.99 (0.95,1.02)                                                          | 0.44    | Pack years                                                           | per pack-year increase | 1.00 (1,1.01)     | 0.59    |
| Chemo                                                           | NO                     | reference                                                                 | 0.69    | Chemo                                                                | NO                     | reference         | <0.001  |
|                                                                 | YES                    | 0.79 (0.25,2.51)                                                          |         |                                                                      | YES                    | 0.35 (0.21,0.59)  |         |
| Clinician-ICD coding discrepancy: HPV-positive vs. HPV-negative |                        |                                                                           |         | OSCC vs. HPV-negative SCCUPHN                                        |                        |                   |         |
| Group                                                           | HPV+ Discrepancy       | reference                                                                 | 0.18    | Group                                                                | OSCC                   | reference         | 0.37    |
|                                                                 | HPV- Discrepancy       | 2.54 (0.78,4.32)                                                          |         |                                                                      | HPV- SCCUPHN           | 0.88 (0.30,1.76)  |         |
| Age                                                             | per year increase      | 1.1 (1.02,1.18)                                                           | 0.01    | Age                                                                  | per year increase      | 1.03 (1.02,1.05)  | <0.001  |
| Stage                                                           | 0/I/II                 | reference                                                                 | 0.92    | Stage                                                                | 0/I/II                 | reference         | <0.001  |
|                                                                 | III/IV                 | 0.93 (0.23,3.68)                                                          |         |                                                                      | III/IV                 | 3.19 (2.33,4.37)  |         |
| Pack years                                                      | per pack-year increase | 1.01 (0.99,1.02)                                                          | 0.34    | Pack years                                                           | per pack-year increase | 1.01 (1,1.01)     | <0.001  |
| Chemo                                                           | NO                     | reference                                                                 | 0.98    | Chemo                                                                | NO                     | reference         | 0.81    |
|                                                                 | YES                    | 0.98 (0.19,5.04)                                                          |         |                                                                      | YES                    | 1.05 (0.72,1.53)  |         |

*Appendix Table 5. Multivariable analysis for disease-free survival among each comparison groups.*

| OPSCC HPV-positive vs. HPV-negative                             |                        |                                                                           |         | HPV-positive OPSCC vs. HPV-positive Grey zone                        |                        |                  |         |
|-----------------------------------------------------------------|------------------------|---------------------------------------------------------------------------|---------|----------------------------------------------------------------------|------------------------|------------------|---------|
| Covariate                                                       |                        | HR (95%CI)                                                                | p-value | Covariate                                                            |                        | HR (95%CI)       | p-value |
| Group                                                           | HPV+ OPC               | reference                                                                 | <0.001  | Group                                                                | HPV+ OPC               | reference        | 0.21    |
|                                                                 | HPV- OPC               | 3.25 (2.45,4.31)                                                          |         |                                                                      | HPV+ Discrepancy       | 1.22 (0.78,2.53) |         |
|                                                                 |                        |                                                                           |         |                                                                      | HPV+ SCCUPHN           | 0.86 (0.47,1.35) |         |
| Age                                                             | per year increase      | 1.01 (1.00,1.03)                                                          | 0.12    | Age                                                                  | per year increase      | 1.03 (1.01,1.05) | 0.005   |
| Stage                                                           | 0/I/II                 | reference                                                                 | <0.001  | Stage2                                                               | 0/I/II                 | reference        | 0.15    |
|                                                                 | III/IV                 | 3.14 (1.8,5.5)                                                            |         |                                                                      | III/IV                 | 2.36 (0.74,7.52) |         |
| Pack years                                                      | per pack-year increase | 1.01 (1.00,1.01)                                                          | 0.01    | Pack years                                                           | per pack-year increase | 1.01 (1.00,1.02) | 0.001   |
| Chemo                                                           | NO                     | reference                                                                 | <0.001  | Chemo                                                                | NO                     | reference        | 0.01    |
|                                                                 | YES                    | 0.56 (0.42,0.74)                                                          |         |                                                                      | YES                    | 0.64 (0.45,0.9)  |         |
| SCCUPHN: HPV-positive vs. HPV-negative                          |                        |                                                                           |         | HPV-negative OPSCC vs. HPV-negative clinician ICD coding discrepancy |                        |                  |         |
| Group                                                           | HPV+ SCCUPHN           | reference                                                                 | 0.006   | Group                                                                | HPV- DISCREPANCY       | reference        | 0.34    |
|                                                                 | HPV- SCCUPHN           | 5.35 (1.68,17.8)                                                          |         |                                                                      | HPV- OPC               | 1.26 (0.70,2.33) |         |
| Age                                                             | per year increase      | 1.03 (0.97,1.09)                                                          | 0.32    | Age                                                                  | per year increase      | 1.00 (0.98,1.02) | 0.74    |
| Stage                                                           | 0/I/II                 | not applicable as by definition, almost all SCCUPHN would be Stage III/IV |         | Stage                                                                | 0/I/II                 | reference        | <0.001  |
|                                                                 | III/IV                 |                                                                           |         |                                                                      | III/IV                 | 2.66 (1.51,4.66) |         |
| Pack years                                                      | per pack-year increase | 0.99 (0.96,1.02)                                                          | 0.43    | Pack years                                                           | per pack-year increase | 1.00 (1.00,1.01) | 0.31    |
| Chemo                                                           | NO                     | reference                                                                 | 0.99    | Chemo                                                                | NO                     | reference        | 0.008   |
|                                                                 | YES                    | 0.99 (0.33,3.02)                                                          |         |                                                                      | YES                    | 0.55 (0.36,0.85) |         |
| Clinician-ICD coding discrepancy: HPV-positive vs. HPV-negative |                        |                                                                           |         | OSCC vs. HPV-negative SCCUPHN                                        |                        |                  |         |
| Group                                                           | HPV+ Discrepancy       | reference                                                                 | 0.16    | Group                                                                | HPV- SCCUPHN           | reference        | 0.45    |
|                                                                 | HPV- Discrepancy       | 1.94 (0.72,3.42)                                                          |         |                                                                      | OSCC                   | 1.14 (0.62,2.32) |         |
| Age                                                             | per year increase      | 1.06 (1.00,1.13)                                                          | 0.05    | Age                                                                  | per year increase      | 1.03 (1.02,1.04) | <0.001  |
| Stage                                                           | 0/I/II                 | reference                                                                 | 0.96    | Stage                                                                | 0/I/II                 | reference        | <0.001  |
|                                                                 | III/IV                 | 0.97 (0.29,3.23)                                                          |         |                                                                      | III/IV                 | 2.64 (1.99,3.50) |         |
| Pack years                                                      | per pack-year increase | 1.01 (1.00,1.02)                                                          | 0.25    | Pack years                                                           | per pack-year increase | 1.01 (1.00,1.01) | 0.01    |
| Chemo                                                           | NO                     | reference                                                                 | 0.91    | Chemo                                                                | NO                     | reference        | 0.77    |
|                                                                 | YES                    | 1.08 (0.30,3.93)                                                          |         |                                                                      | YES                    | 1.05 (0.74,1.5)  |         |

**Appendix Figure 1.** Summary for the association between oropharyngeal squamous cell (OPSCC), oral cavity squamous cell carcinoma (OSCC), and grey zone cases (Clinician-ICD discrepant coding and squamous cell carcinoma of unknown primary of the head and neck region, SCCUPHN) by HPV status.

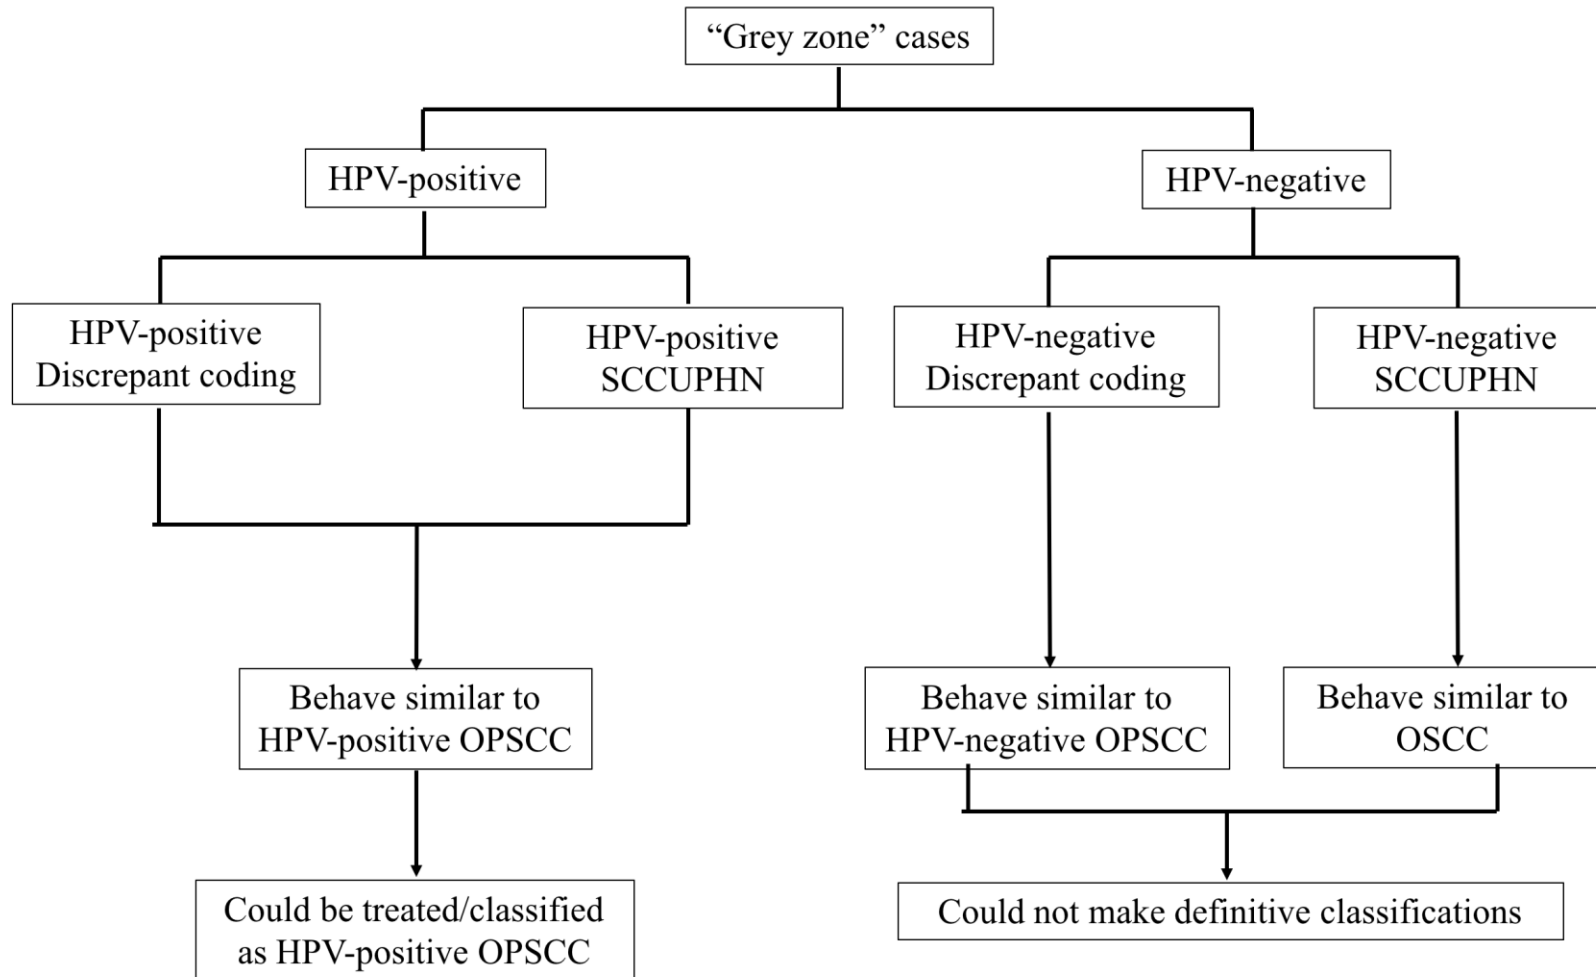

Supplement: Supplementary file 1 [file 16188341]
